# Supplementary material for: Combination of Chinese and Western Medicine Optimizes the Intestinal Microbiota of Exacerbated Chronic Obstructive Pulmonary Disease in Rats
Source: Evid Based Complement Alternat Med. 2021 Sep 8;2021:9975407. doi: 10.1155/2021/9975407 (PMC8445717; doi:10.1155/2021/9975407)
Supplement: Supplementary Materials — S1: pulmonary function. Evaluation of the FVC, FEV0.3, FEV0.3/FVC of the intervention of combination Chinese and Western medicine in AECOPD rats. S2: evaluation of the CRP and SAA level in serum of the intervention of combination Chinese and Western medicine in AECOPD rats. S3: sequence quality. Sequencing quantity of samples after the raw sequence data were demultiplexed, quality filtered, denoised, merged, and chimera removed in each group. S4: sequencing length. The distribution range of sequencing length of samples. S5: the number of taxa. The number of taxa at the six classification levels (domain, phylum, class, order, family, genus, species). S6: alpha index. The Observed species, Shannon index, Simpson index, Faith's Phylogenetic Diversity index, and Pielou's Evenness index in each group. S7: PCoA analysis. Principal coordinates analysis (PCoA) based on Bray-Curtis distance matrix algorithm. The principal coordinate analysis method is used to project the distance matrix of the samples, and get the scores of the samples on the first, second and third principal coordinates. S8: difference between groups. PERMANOVA, ANOSIM, and PERMDISP tests were used to verify the differences of PCoA. S9: phylum level proportion. The top 10 microbiota with a proportion of more than 1% include Firmicutes, Bacteroidetes, Proteobacteria, as well as TM7 at the phylum level. S10: genus level proportion. The top 10 microbiota with a proportion of more than 1% include Lactobacillus, Oscillospira, Clostridium, Allobaculum, Ruminococcus, Blautia, Treponema, as well as Turicibacter at the genus level. [file 9975407.f1.zip]

Archive with 11 entries (11 files):
- phylum level.txt
- S1 Pulmonary function.txt
- S10 Genus level proportion.txt
- S2 CRP and SAA level in serum.txt
- S3 Sequence quality.txt
- S4 Sequencing length.txt
- S5 The number of taxa.txt
- S6 Alpha index.txt
- S7 PCoA analysis.txt
- S8 Difference between groups.txt
- S9 Phylum level proportion.txt
