# Supplementary material for: Combination of Chinese and Western Medicine Optimizes the Intestinal Microbiota of Exacerbated Chronic Obstructive Pulmonary Disease in Rats
Source: Evid Based Complement Alternat Med. 2021 Sep 8;2021:9975407. doi: 10.1155/2021/9975407 (PMC8445717; doi:10.1155/2021/9975407)
Supplement: Supplementary Materials — S1: pulmonary function. Evaluation of the FVC, FEV0.3, FEV0.3/FVC of the intervention of combination Chinese and Western medicine in AECOPD rats. S2: evaluation of the CRP and SAA level in serum of the intervention of combination Chinese and Western medicine in AECOPD rats. S3: sequence quality. Sequencing quantity of samples after the raw sequence data were demultiplexed, quality filtered, denoised, merged, and chimera removed in each group. S4: sequencing length. The distribution range of sequencing length of samples. S5: the number of taxa. The number of taxa at the six classification levels (domain, phylum, class, order, family, genus, species). S6: alpha index. The Observed species, Shannon index, Simpson index, Faith's Phylogenetic Diversity index, and Pielou's Evenness index in each group. S7: PCoA analysis. Principal coordinates analysis (PCoA) based on Bray-Curtis distance matrix algorithm. The principal coordinate analysis method is used to project the distance matrix of the samples, and get the scores of the samples on the first, second and third principal coordinates. S8: difference between groups. PERMANOVA, ANOSIM, and PERMDISP tests were used to verify the differences of PCoA. S9: phylum level proportion. The top 10 microbiota with a proportion of more than 1% include Firmicutes, Bacteroidetes, Proteobacteria, as well as TM7 at the phylum level. S10: genus level proportion. The top 10 microbiota with a proportion of more than 1% include Lactobacillus, Oscillospira, Clostridium, Allobaculum, Ruminococcus, Blautia, Treponema, as well as Turicibacter at the genus level. [file 9975407.f1.zip › S1 Pulmonary function.txt]

FVC
Control	COPD	AECOPD	MXF/STL	TMS/FS
10.23231888	7.840326	6.009061	10.1666	10.85653
10.19139194	7.66297	6.449707	9.908415	11.52768
10.05666637	7.4483	7.094909	10.14343	11.64927
10.59054756	7.368221	7.104786	8.808632	9.641206
10.43545341	7.238588	6.504161	8.836635	9.458605
10.38282967	7.572807	6.733188	8.837148	9.930372
12.82410526	6.951569	6.530758	10.07124	11.17781
12.37513542	7.047429	6.499826	9.549309	11.81857
11.84436512	6.863233	6.566141	10.12349	11.85966
14.55008602	7.367312	7.298225	7.684573	8.473247
14.83990383	7.182279	7.058193	7.55495	8.216174
14.37283134	7.221099	7.061317	7.765066	8.394997
12.96467781	7.398334	5.889551	9.204017	10.04163
12.31577826	7.410873	5.808571	8.596255	11.22923
12.0622859	7.970635	6.253922	8.461731	11.31764
11.09238625	10.65733	5.758714	8.47357	8.618728
10.95273495	11.34668	5.765638	9.150016	8.794129
10.95697308	9.835524	5.604569	8.903189	9.245845
13.37751293	9.39457	6.071428	8.674867	13.03022
13.13585567	9.429958	5.67377	10.13638	13.02125
13.28123713	9.076113	6.469464	9.25435	12.93008
		7.320286	9.350516	11.90951
		7.335666	9.316974	11.10553
		6.976004	10.172	11.74989
		5.969523	10.45642
		5.503851	10.62807
		5.791075	10.17102
			8.706783
			8.555017
FEV0.3
Control	COPD	AECOPD	MXF/STL	TMS/FS
9.350837708	6.9135	3.966435	8.331038	9.348856
9.277621269	6.718027	3.918951	7.788383	10.02794
9.599514389	6.518432	4.16495	7.102798	10.21308
9.664766312	5.691608	4.308366	6.586735	8.540126
9.544939995	5.92782	4.505843	7.193785	8.441771
9.464053154	5.279288	3.731792	7.315726	8.92151
12.0151329	5.90277	4.27628	9.281585	10.77063
11.58262157	6.018769	4.34909	8.98192	10.0095
10.97898769	5.889644	4.247487	9.156798	10.8185
13.59295559	6.289633	5.292915	5.656008	7.837368
13.85354424	6.118415	5.275814	5.529256	7.442905
13.45855808	6.197311	5.291622	5.702174	7.716784
12.20731831	6.647445	3.358011	6.949765	9.062955
11.66584826	5.654828	3.352637	6.227557	10.2439
11.25042057	5.925914	3.698588	6.033459	10.33507
10.8261013	8.808212	3.775716	6.223577	7.611174
10.76567173	8.692207	3.780438	7.883488	7.807632
10.79223919	8.03844	3.605744	7.634248	8.221004
12.57220268	7.418077	3.904614	7.366539	11.77321
12.28296232	7.469442	3.369743	8.680718	11.67653
12.40775585	7.088315	4.193111	7.968005	11.7248
		5.046028	7.235893	11.51691
		5.033324	7.227897	11.52824
		4.667138	8.067789	11.22038
		3.858558	9.712341
		3.478723	9.656787
		3.629635	9.275517
			6.866764
			6.405107
			6.859735
FEV0.3/FVC
Control	COPD	AECOPD	MXF/STL	TMS/FS
0.913853235	0.881787318	0.660075763	0.819452053	0.861127811
0.910338972	0.876687169	0.607616907	0.786037187	0.869901263
0.954542393	0.875156992	0.587033693	0.70023657	0.876714347
0.912584194	0.772453513	0.606403354	0.747759113	0.885794424
0.914664616	0.818919362	0.692763079	0.814086472	0.89249638
0.911510008	0.697137505	0.554238426	0.827837911	0.898406377
0.936917832	0.849127726	0.654790832	0.921593093	0.963572153
0.935959178	0.854037578	0.669108676	0.940583267	0.846929665
0.926937627	0.858144235	0.646877295	0.904509927	0.912210222
0.934218229	0.853721525	0.725233185	0.736021109	0.924954498
0.933533289	0.851876512	0.747473725	0.731871899	0.905884519
0.936388785	0.8582227	0.749381671	0.734336922	0.91921217
0.941582852	0.898505601	0.570164209	0.755079576	0.902538157
0.947227858	0.763044769	0.577187852	0.724450025	0.912252959
0.932693908	0.743468211	0.591402925	0.71302887	0.913181815
0.975993899	0.82649308	0.655652677	0.734469333	0.883097124
0.982920867	0.766057537	0.655684291	0.861581938	0.887823242
0.984965384	0.817286407	0.643357915	0.857473508	0.889156553
0.939801198	0.789613276	0.643112918	0.84918182	0.903531075
0.935071352	0.792097069	0.593915978	0.8563927	0.896729005
0.934231934	0.780985782	0.648138939	0.8610011	0.906784505
		0.689321148	0.773849593	0.967034972
		0.686144059	0.7757773	0.948017826
		0.669027474	0.79313666	0.954935029
		0.646376223	0.928840359
		0.632052501	0.908611375
		0.626763682	0.911955344
