# Supplementary material for: Combination of Chinese and Western Medicine Optimizes the Intestinal Microbiota of Exacerbated Chronic Obstructive Pulmonary Disease in Rats
Source: Evid Based Complement Alternat Med. 2021 Sep 8;2021:9975407. doi: 10.1155/2021/9975407 (PMC8445717; doi:10.1155/2021/9975407)
Supplement: Supplementary Materials — S1: pulmonary function. Evaluation of the FVC, FEV0.3, FEV0.3/FVC of the intervention of combination Chinese and Western medicine in AECOPD rats. S2: evaluation of the CRP and SAA level in serum of the intervention of combination Chinese and Western medicine in AECOPD rats. S3: sequence quality. Sequencing quantity of samples after the raw sequence data were demultiplexed, quality filtered, denoised, merged, and chimera removed in each group. S4: sequencing length. The distribution range of sequencing length of samples. S5: the number of taxa. The number of taxa at the six classification levels (domain, phylum, class, order, family, genus, species). S6: alpha index. The Observed species, Shannon index, Simpson index, Faith's Phylogenetic Diversity index, and Pielou's Evenness index in each group. S7: PCoA analysis. Principal coordinates analysis (PCoA) based on Bray-Curtis distance matrix algorithm. The principal coordinate analysis method is used to project the distance matrix of the samples, and get the scores of the samples on the first, second and third principal coordinates. S8: difference between groups. PERMANOVA, ANOSIM, and PERMDISP tests were used to verify the differences of PCoA. S9: phylum level proportion. The top 10 microbiota with a proportion of more than 1% include Firmicutes, Bacteroidetes, Proteobacteria, as well as TM7 at the phylum level. S10: genus level proportion. The top 10 microbiota with a proportion of more than 1% include Lactobacillus, Oscillospira, Clostridium, Allobaculum, Ruminococcus, Blautia, Treponema, as well as Turicibacter at the genus level. [file 9975407.f1.zip › S3 Sequence quality.txt]

SampleID	Input	Filtered	Denoised	Merged	Nonchimeric Nonsingleton
A195	138933	127642	123808	103756	76461	74387
A214	132216	122177	118457	102553	67867	66223
A169	139079	127204	123904	109936	80685	79288
A209	133822	123640	120108	105356	58738	56998
A211	134756	124604	121763	109129	63631	62688
B137	140140	127425	123992	109785	74597	73467
B174	133264	124127	121030	108273	70367	69152
B154	136509	125207	121571	105275	74395	73207
B70	145028	132762	129740	118281	90754	89794
B87	141381	130048	125914	105764	74082	72246
B54	136967	126579	123566	111392	83506	82358
B4	139418	129150	125129	105507	75721	73638
B86	144186	132285	129292	115612	94666	93609
C89	134152	122424	119006	103779	68880	67334
C10	133618	124350	121612	110625	76860	75999
C62	132931	121048	117090	96210	61981	60415
C40	133272	125625	121774	101699	60460	58950
C110	142291	127785	123819	102062	69673	67808
I32	135971	124221	120083	99291	62706	60811
I51	135956	126330	123519	111773	63575	62147
I168	132573	121241	117647	98781	67355	65913
I160	140174	129562	125853	109933	63737	62277
I118	137706	126453	123322	107558	78667	77494
K49	135034	124011	119877	99619	62398	59178
K56	137163	123150	118568	94948	57659	54703
K31	134542	123499	119583	99239	63151	60977
K29	141239	131010	127092	108403	62792	60333
K202	132415	121147	117310	100519	64366	62653
