# Supplementary material for: Combination of Chinese and Western Medicine Optimizes the Intestinal Microbiota of Exacerbated Chronic Obstructive Pulmonary Disease in Rats
Source: Evid Based Complement Alternat Med. 2021 Sep 8;2021:9975407. doi: 10.1155/2021/9975407 (PMC8445717; doi:10.1155/2021/9975407)
Supplement: Supplementary Materials — S1: pulmonary function. Evaluation of the FVC, FEV0.3, FEV0.3/FVC of the intervention of combination Chinese and Western medicine in AECOPD rats. S2: evaluation of the CRP and SAA level in serum of the intervention of combination Chinese and Western medicine in AECOPD rats. S3: sequence quality. Sequencing quantity of samples after the raw sequence data were demultiplexed, quality filtered, denoised, merged, and chimera removed in each group. S4: sequencing length. The distribution range of sequencing length of samples. S5: the number of taxa. The number of taxa at the six classification levels (domain, phylum, class, order, family, genus, species). S6: alpha index. The Observed species, Shannon index, Simpson index, Faith's Phylogenetic Diversity index, and Pielou's Evenness index in each group. S7: PCoA analysis. Principal coordinates analysis (PCoA) based on Bray-Curtis distance matrix algorithm. The principal coordinate analysis method is used to project the distance matrix of the samples, and get the scores of the samples on the first, second and third principal coordinates. S8: difference between groups. PERMANOVA, ANOSIM, and PERMDISP tests were used to verify the differences of PCoA. S9: phylum level proportion. The top 10 microbiota with a proportion of more than 1% include Firmicutes, Bacteroidetes, Proteobacteria, as well as TM7 at the phylum level. S10: genus level proportion. The top 10 microbiota with a proportion of more than 1% include Lactobacillus, Oscillospira, Clostridium, Allobaculum, Ruminococcus, Blautia, Treponema, as well as Turicibacter at the genus level. [file 9975407.f1.zip › S4 Sequencing length.txt]

length	count
45	66
50	13427
51	126
102	285
110	211
111	91
161	13
174	2
178	12
182	44
188	2
191	65
192	13
205	2
209	3
213	2
214	6
220	2
225	33
233	4
234	121
236	2
237	6
242	2
245	2
247	3
248	4
249	10
253	2
256	2
257	2
258	8
259	2
261	2
263	2
264	3
266	4
271	6
272	23
273	4
278	3
279	33
280	2
282	2
283	2
284	5
285	3
290	3
291	4
292	10
293	11
295	3
299	6
301	2
302	4
303	5
306	3
307	18
310	5
317	3
318	133
319	167
320	15
321	58
322	1
323	2
326	81
327	2
328	4
330	2
331	3
333	2
334	3
335	2
337	4
338	19
339	8
340	5
341	4
342	4
343	15
344	3
345	17
346	74
347	9
348	2
349	7
350	1
353	6
354	2
355	5
356	16
357	5
359	4
361	10
362	5
363	4
364	1
365	6
366	6
367	15
368	9
369	4
371	34
372	2
373	3
375	2
376	37
377	15
378	9
379	1
380	8
384	2
385	2
386	4
387	6
388	2
389	12
390	5
392	4
393	20
394	1
395	1
399	2
401	61
402	24
403	20
404	227564
405	377778
406	189772
407	80990
408	329991
409	20221
410	2081
411	1423
412	178
413	60
414	49
415	203
416	23
417	82
418	129
419	15
420	33
421	19
422	878
423	17684
424	87254
425	99467
426	3716
427	800
428	621
429	51607
430	368012
431	91838
432	1435
433	39
