# Supplementary material for: Combination of Chinese and Western Medicine Optimizes the Intestinal Microbiota of Exacerbated Chronic Obstructive Pulmonary Disease in Rats
Source: Evid Based Complement Alternat Med. 2021 Sep 8;2021:9975407. doi: 10.1155/2021/9975407 (PMC8445717; doi:10.1155/2021/9975407)
Supplement: Supplementary Materials — S1: pulmonary function. Evaluation of the FVC, FEV0.3, FEV0.3/FVC of the intervention of combination Chinese and Western medicine in AECOPD rats. S2: evaluation of the CRP and SAA level in serum of the intervention of combination Chinese and Western medicine in AECOPD rats. S3: sequence quality. Sequencing quantity of samples after the raw sequence data were demultiplexed, quality filtered, denoised, merged, and chimera removed in each group. S4: sequencing length. The distribution range of sequencing length of samples. S5: the number of taxa. The number of taxa at the six classification levels (domain, phylum, class, order, family, genus, species). S6: alpha index. The Observed species, Shannon index, Simpson index, Faith's Phylogenetic Diversity index, and Pielou's Evenness index in each group. S7: PCoA analysis. Principal coordinates analysis (PCoA) based on Bray-Curtis distance matrix algorithm. The principal coordinate analysis method is used to project the distance matrix of the samples, and get the scores of the samples on the first, second and third principal coordinates. S8: difference between groups. PERMANOVA, ANOSIM, and PERMDISP tests were used to verify the differences of PCoA. S9: phylum level proportion. The top 10 microbiota with a proportion of more than 1% include Firmicutes, Bacteroidetes, Proteobacteria, as well as TM7 at the phylum level. S10: genus level proportion. The top 10 microbiota with a proportion of more than 1% include Lactobacillus, Oscillospira, Clostridium, Allobaculum, Ruminococcus, Blautia, Treponema, as well as Turicibacter at the genus level. [file 9975407.f1.zip › S6 Alpha index.txt]

Sample	Chao1	Faith_pd	Goods_coverage	Observed_species	Pielou_e	Shannon	Simpson	Group
A195	3793.3625	189.31875	0.974235	2892.5	0.60008	6.899775	0.929305	Control
A169	3835.5375	199.61625	0.97555	2802.75	0.723081	8.281163	0.977886	Control
A214	3852.4375	207.8625	0.976589	3046.5	0.698619	8.085038	0.95933	Control
A209	3252.55	200.42625	0.979498	2646.375	0.664551	7.5558	0.956866	Control
A211	2532.65	161.20125	0.9861	2122.625	0.594476	6.5699	0.930272	Control
B137	2768.525	180.90875	0.982064	2089.75	0.665239	7.336975	0.969496	COPD
B87	4090.375	228.56875	0.97421	3159.875	0.776331	9.02535	0.991438	COPD
B54	2741.0875	177.09625	0.983308	2050.75	0.685882	7.546012	0.976531	COPD
B174	3225.5625	186.7275	0.97962	2393.75	0.706416	7.92955	0.981188	COPD
B154	3495.9125	205.8025	0.977596	2547.375	0.738618	8.357262	0.987621	COPD
B70	2700.65	172.62875	0.983919	1979.125	0.741256	8.117188	0.984961	COPD
B4	4390.05	228.01	0.97157	3310.125	0.733185	8.57285	0.98359	COPD
B86	2674.325	164.43375	0.984826	2028.5	0.775532	8.520112	0.992314	COPD
C89	3309.2	204.51125	0.979844	2658.625	0.728573	8.288562	0.981638	AECOPD
C10	2198.6875	128.1175	0.987526	1798.625	0.632928	6.843625	0.955159	AECOPD
C62	3869.125	232.65375	0.975085	3058.5	0.74228	8.594562	0.983775	AECOPD
C40	3400.6875	215.3725	0.97851	2712.875	0.715678	8.1627	0.981806	AECOPD
C110	3869.4625	217.225	0.975061	2962.5	0.771276	8.8948	0.992698	AECOPD
I51	2717.2875	168.5825	0.983084	2209	0.670798	7.451988	0.970052	MXF/STL
I168	3821.375	201.19375	0.975389	2916.125	0.766886	8.826725	0.992578	MXF/STL
I118	3282.925	197.8975	0.979304	2443.625	0.664669	7.480712	0.946262	MXF/STL
I32	3856.2	217.8975	0.974902	2988.875	0.756046	8.728812	0.989965	MXF/STL
I160	3344.625	202.51875	0.979231	2702.375	0.710882	8.10405	0.973759	MXF/STL
K49	4783.1125	258.13	0.969425	4029	0.733315	8.782325	0.97365	TMS/FS
K56	4013.7625	248.855	0.976466	3497.375	0.780964	9.19355	0.993746	TMS/FS
K31	3270.425	228.57625	0.97916	2729.625	0.66191	7.55535	0.940483	TMS/FS
K29	3380.0375	221.21875	0.979861	2866.25	0.75251	8.642538	0.988891	TMS/FS
K202	3433.725	217.6825	0.977417	2689.625	0.735108	8.375187	0.988222	TMS/FS
