# Supplementary material for: Combination of Chinese and Western Medicine Optimizes the Intestinal Microbiota of Exacerbated Chronic Obstructive Pulmonary Disease in Rats
Source: Evid Based Complement Alternat Med. 2021 Sep 8;2021:9975407. doi: 10.1155/2021/9975407 (PMC8445717; doi:10.1155/2021/9975407)
Supplement: Supplementary Materials — S1: pulmonary function. Evaluation of the FVC, FEV0.3, FEV0.3/FVC of the intervention of combination Chinese and Western medicine in AECOPD rats. S2: evaluation of the CRP and SAA level in serum of the intervention of combination Chinese and Western medicine in AECOPD rats. S3: sequence quality. Sequencing quantity of samples after the raw sequence data were demultiplexed, quality filtered, denoised, merged, and chimera removed in each group. S4: sequencing length. The distribution range of sequencing length of samples. S5: the number of taxa. The number of taxa at the six classification levels (domain, phylum, class, order, family, genus, species). S6: alpha index. The Observed species, Shannon index, Simpson index, Faith's Phylogenetic Diversity index, and Pielou's Evenness index in each group. S7: PCoA analysis. Principal coordinates analysis (PCoA) based on Bray-Curtis distance matrix algorithm. The principal coordinate analysis method is used to project the distance matrix of the samples, and get the scores of the samples on the first, second and third principal coordinates. S8: difference between groups. PERMANOVA, ANOSIM, and PERMDISP tests were used to verify the differences of PCoA. S9: phylum level proportion. The top 10 microbiota with a proportion of more than 1% include Firmicutes, Bacteroidetes, Proteobacteria, as well as TM7 at the phylum level. S10: genus level proportion. The top 10 microbiota with a proportion of more than 1% include Lactobacillus, Oscillospira, Clostridium, Allobaculum, Ruminococcus, Blautia, Treponema, as well as Turicibacter at the genus level. [file 9975407.f1.zip › S7 PCoA analysis.txt]

ID	Group	PCo1	PCo2
A195	Control	-0.005682	-0.127155
A169	Control	-0.028971	-0.255617
A214	Control	-0.34389	0.121044
A209	Control	0.090949	-0.272427
A211	Control	-0.337839	0.176694
B137	COPD	0.06696	-0.35206
B87	COPD	-0.162507	-0.028165
B54	COPD	-0.140919	-0.041351
B174	COPD	0.022296	-0.271023
B154	COPD	-0.084302	-0.072419
B70	COPD	-0.030219	-0.097371
B4	COPD	-0.172459	-0.03723
B86	COPD	-0.104935	-0.115995
C89	AECOPD	-0.183889	0.091568
C10	AECOPD	-0.278355	0.15814
C62	AECOPD	-0.100974	0.106618
C40	AECOPD	-0.131369	0.170569
C110	AECOPD	0.103956	0.10445
I51	MXF/STL	0.090308	-0.193384
I168	MXF/STL	0.165866	0.100897
I118	MXF/STL	0.227191	-0.244987
I32	MXF/STL	0.159353	0.135414
I160	MXF/STL	-0.150513	0.062427
K49	TMS/FS	0.253628	-0.123653
K56	TMS/FS	0.306143	0.307608
K31	TMS/FS	0.252006	0.303918
K29	TMS/FS	0.230238	0.273483
K202	TMS/FS	0.28793	0.120006
