# Supplementary material for: Combination of Chinese and Western Medicine Optimizes the Intestinal Microbiota of Exacerbated Chronic Obstructive Pulmonary Disease in Rats
Source: Evid Based Complement Alternat Med. 2021 Sep 8;2021:9975407. doi: 10.1155/2021/9975407 (PMC8445717; doi:10.1155/2021/9975407)
Supplement: Supplementary Materials — S1: pulmonary function. Evaluation of the FVC, FEV0.3, FEV0.3/FVC of the intervention of combination Chinese and Western medicine in AECOPD rats. S2: evaluation of the CRP and SAA level in serum of the intervention of combination Chinese and Western medicine in AECOPD rats. S3: sequence quality. Sequencing quantity of samples after the raw sequence data were demultiplexed, quality filtered, denoised, merged, and chimera removed in each group. S4: sequencing length. The distribution range of sequencing length of samples. S5: the number of taxa. The number of taxa at the six classification levels (domain, phylum, class, order, family, genus, species). S6: alpha index. The Observed species, Shannon index, Simpson index, Faith's Phylogenetic Diversity index, and Pielou's Evenness index in each group. S7: PCoA analysis. Principal coordinates analysis (PCoA) based on Bray-Curtis distance matrix algorithm. The principal coordinate analysis method is used to project the distance matrix of the samples, and get the scores of the samples on the first, second and third principal coordinates. S8: difference between groups. PERMANOVA, ANOSIM, and PERMDISP tests were used to verify the differences of PCoA. S9: phylum level proportion. The top 10 microbiota with a proportion of more than 1% include Firmicutes, Bacteroidetes, Proteobacteria, as well as TM7 at the phylum level. S10: genus level proportion. The top 10 microbiota with a proportion of more than 1% include Lactobacillus, Oscillospira, Clostridium, Allobaculum, Ruminococcus, Blautia, Treponema, as well as Turicibacter at the genus level. [file 9975407.f1.zip › S10 Genus level proportion.txt]

ID	Lactobacillus	Oscillospira	Clostridiaceae_Clostridium	Allobaculum	Ruminococcaceae_Ruminococcus	Blautia	Treponema	Turicibacter	Acinetobacter	Shigella	Others
A59	0.00579537	0.10227597	0.02724911	0.00429891	0.03230985	0.02514046	0.01335927	0.01661066	0	0.000095	0.77286517
A37	0.00602145	0.02588662	0.06038335	0.00429943	0.02658443	0.09862801	0.00415311	0.01969634	0	0.00065279	0.75369447
A98	0.05324594	0.06452828	0.07776306	0.00753086	0.08056621	0.03207587	0.00900913	0.01329057	0	0.00097622	0.66101388
A97	0.01484047	0.03433647	0.07718953	0.00136647	0.00869137	0.03992945	0.02979217	0.03905555	0	0.00046079	0.75433774
A216	0.00244691	0.05198615	0.00569515	0.01576899	0.00538034	0.01649877	0.00186023	0.00343426	0	0.00188884	0.89504035
B184	0.67674228	0.0236354	0.00577353	0.05946739	0.00406553	0.000854	0.00163583	0.00286271	0	0.00014434	0.22481898
B193	0.03103425	0.11605959	0.03618678	0.12092304	0.01962385	0.00025508	0.13078597	0.01491344	0	0.00039112	0.52982689
B137	0.2549444	0.03225938	0.02948262	0.06081642	0.01091647	0.00421958	0.03495447	0.0030626	0	0.000095	0.56924878
B87	0.01565485	0.14659635	0.02813997	0.01852006	0.02575921	0.00964759	0.0346732	0.00514907	0.00020762	0.00045677	0.7151953
B54	0.0153962	0.05433595	0.01886884	0.00496612	0.0066903	0.00033998	0.02189223	0.00757668	0.34535807	0.00033998	0.52423565
C89	0.00090593	0.10029109	0.02741557	0.0027772	0.01130187	0.000059	0.00190097	0.01179196	0	0.00041584	0.84314017
C10	0.01938183	0.01559231	0.03776365	0.00030264	0.00513165	0.00114475	0.00061843	0.02989513	0.00332899	0.00061843	0.88622219
C62	0.02072333	0.04980551	0.12205578	0.01047753	0.03992386	0.04283704	0.03063809	0.02477861	0	0.00043036	0.65832988
C40	0.0039525	0.06705683	0.048838	0.0490246	0.02317218	0.01976251	0.00215437	0.03289228	0	0.00140797	0.75173876
C110	0.01738733	0.11597452	0.04683813	0.00365739	0.03132374	0.0166942	0.0196142	0.00842084	0	0.00032445	0.73976522
I51	0.31723172	0.01462661	0.02920495	0.03557694	0.03428967	0.03784575	0.00785235	0.01121534	0	0.00593754	0.50621913
I168	0.04994462	0.05750004	0.04149409	0.00881465	0.03050991	0.06054951	0.01300199	0.00223021	0	0.00098615	0.73496882
I118	0.35069812	0.04218391	0.0155754	0.00325186	0.01394947	0.02340826	0.06492116	0.00360028	0	0.00038713	0.48202441
I32	0.06518557	0.06638602	0.03912121	0.00430843	0.03665455	0.01440529	0.01095197	0.02206838	0	0.00343688	0.73748171
I160	0.14902773	0.02749008	0.07301251	0.02490486	0.00997158	0.03609679	0.00115613	0.02559532	0	0.00077075	0.65197424
K49	0.31553956	0.06235425	0.01397479	0.00260232	0.01578289	0.00544121	0.0203285	0.00902362	0	0.00033796	0.55461489
K56	0.01210171	0.01987094	0.01328995	0.03412976	0.04072903	0.03151564	0.00082262	0.00791547	0	0.00018281	0.83944208
K31	0.01533365	0.0219099	0.04673893	0.01731801	0.01182413	0.0042967	0.00132837	0.02271348	0	0.2805484	0.57798842
K29	0.02090067	0.02053603	0.00866856	0.06714402	0.01213266	0.01140338	0.00056354	0.02003878	0.000017	0.01188404	0.82671175
K202	0.13324182	0.08986002	0.0233668	0.05461829	0.0131518	0.01152379	0.00150033	0.00778893	0	0.00008	0.6648684
